# Supplementary material
Source: publisher figshare collection journal article supplement (https://karger.figshare.com/ndownloader/files/21494502)
Supplement: Supplementary file 1 [file 21494502]

**Supplementary Table 1.** Kidney allograft biopsy findings and outcomes based on those who underwent biopsy (N=23)

| Pt No. | Pre-transplant DSA | Maximum MFI  >10,000 | Death | Kidney allograft loss before death | WKF | 1st biopsy | 2nd  biopsy | 3rd  biopsy | 4th biopsy | 5th biopsy | 6th biopsy |
| --- | --- | --- | --- | --- | --- | --- | --- | --- | --- | --- | --- |
| 1 | Yes | No | No | No | No | ATN (30) | Other (106) |  |  |  |  |
| 2 | No | - | No | No | Yes (91) | Other (311) |  |  |  |  |  |
| 3 | No | - | No | No | Yes (101) | ATN (18) | Other (1683) |  |  |  |  |
| 4 | No | - | No | No | Yes (124) | ATN (12) |  |  |  |  |  |
| 5 | Yes | No | No | No | No | ABMR (6) |  |  |  |  |  |
| 6 | No | - | Yes (1409) | Yes (205) | Yes (112) | ATN (31) | ABMR (107) | ACR (180) |  |  |  |
| 7 | No | - | No | No | No | ACR (8) | Other (20) |  |  |  |  |
| 8 | No | - | No | No | No | ATN (8) | ACR (32) | Other (71) | ACR (133) |  |  |
| 9 | No | - | Yes (2371) | Yes (2233) | Yes (96) | ATN (8) | Other (2295) |  |  |  |  |
| 10 | Yes | Yes  (Class II DSA) | No | Yes (1655) | Yes (132) | Other (1264) |  |  |  |  |  |
| 11 | No | - | Yes (400) | No | No | Other (23) | Other (253) |  |  |  |  |
| 12 | No | - | No | No | Yes (341) | Other (790) |  |  |  |  |  |
| 13 | No | - | Yes (290) | Yes (253) | No | ATN (8) | ABMR+ACR (251) |  |  |  |  |
| 14 | No | - | Yes (1492) | No | Yes (206) | Other (8) | ACR (18) | ATN (24) |  |  |  |
| 15 | Yes | No | No | No | No | ATN (5) |  |  |  |  |  |
| 16 | No | - | Yes (802) | No | No | Other (11) | ABMR+ACR (75) | ACR (98) |  |  |  |
| 17 | No | - | No | No | No | ATN (20) |  |  |  |  |  |
| 18 | No | - | No | No | Yes (653) | Other (6) | Other (29) |  |  |  |  |
| 19 | No | - | Yes (104) | No | No | ATN (6) |  |  |  |  |  |
| 20 | Yes | No | Yes (244) | No | No | Other (9) | Other (21) |  |  |  |  |
| 21 | Yes | No | Yes (28) | No | No | ATN (7) | ABMR (17) | ABMR+ACR (23) |  |  |  |
| 22 | Yes | No | Yes (25) | No | No | ATN (10) |  |  |  |  |  |
| 23 | No | - | Yes (134) | No | No | Other (9) | ATN (21) | ATN (34) | ATN (42) | ACR (55) | ATN (73) |

**Abbreviation:** No.: Number; DSA: Donor specific antibody; MFI: Mean fluorescence intensity; WKF: Worsening kidney function; ATN: Acute tubular Necrosis; ABMR: Antibody-mediated rejection; ACR: Acute cellular rejection

The numbers in the round bracket show the days from transplantation to each outcome and biopsy.
